# Supplementary material for: 15-Deoxy-△12,14-Prostaglandin J2 Promotes Resolution of Experimentally Induced Colitis
Source: PubMed Central journal article supplement (PMC7901909; doi:10.3389/fimmu.2021.615803), 2021-02-02

**A**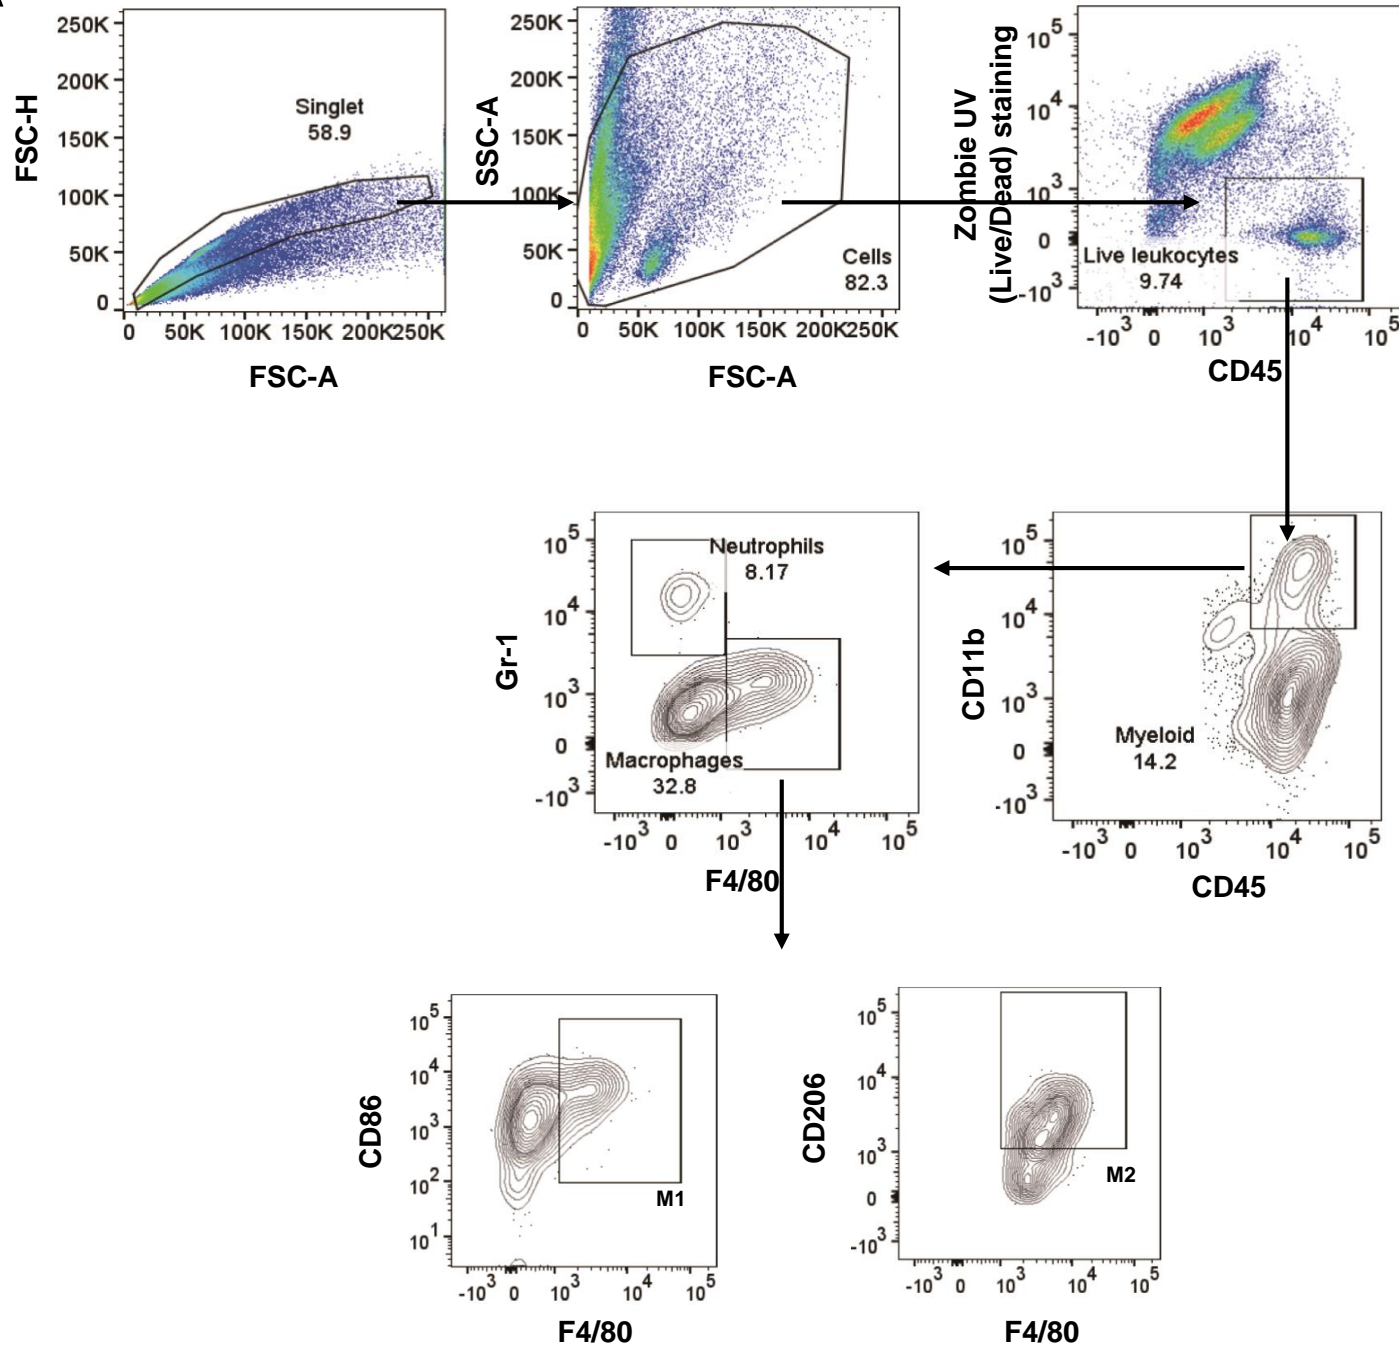

**B**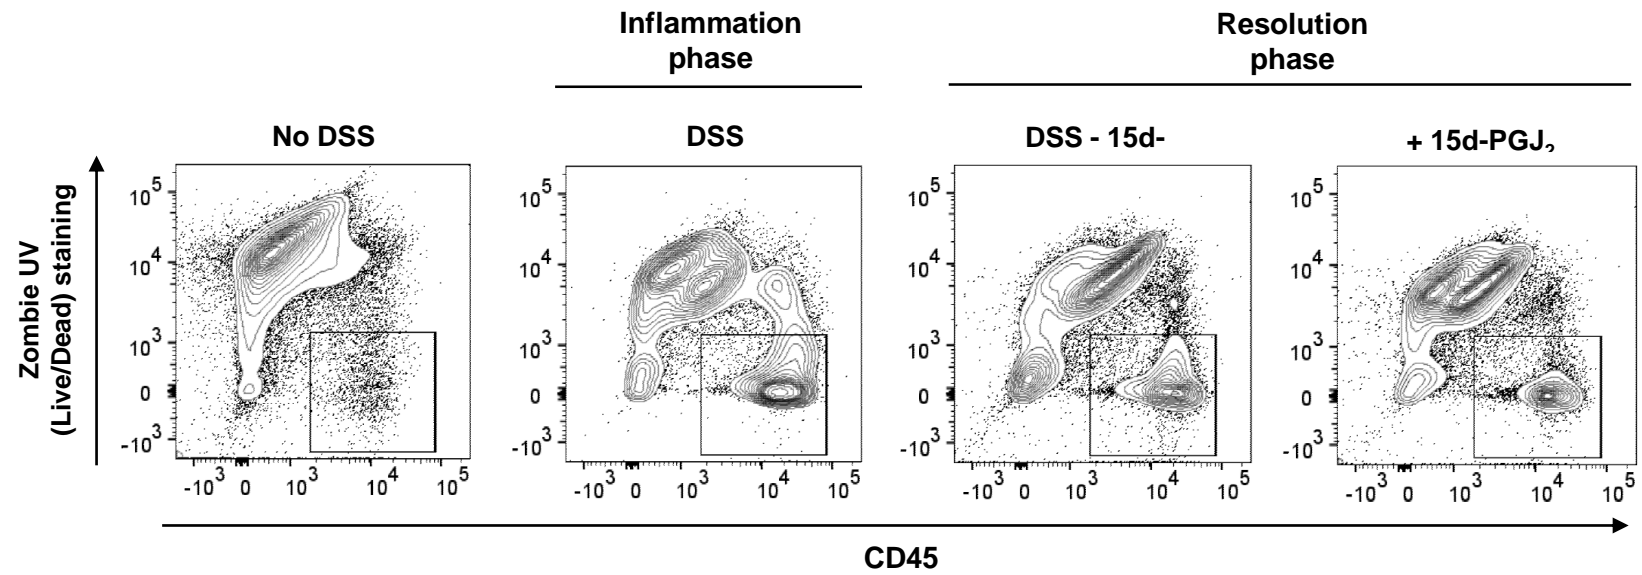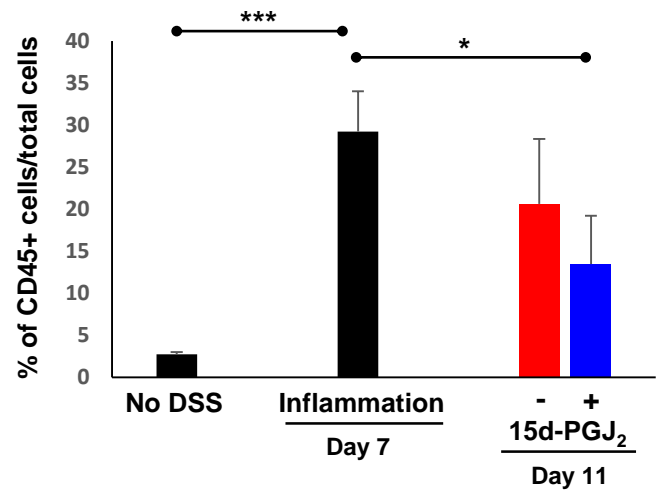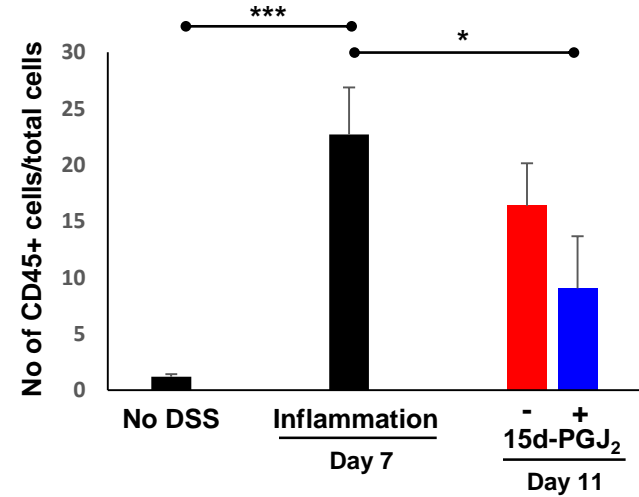

Supplement: DataSheet_1.pdf [file DataSheet_1.pdf]
